# Supplementary material for: Genomic Analyses of Penicillium Species Have Revealed Patulin and Citrinin Gene Clusters and Novel Loci Involved in Oxylipin Production
Source: MDPI journal article supplement (doi:10.3390/jof7090743), 2021-09-09
Supplement: s1 [file s1]

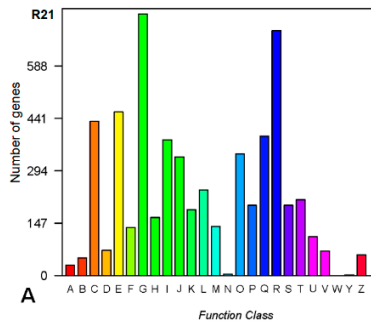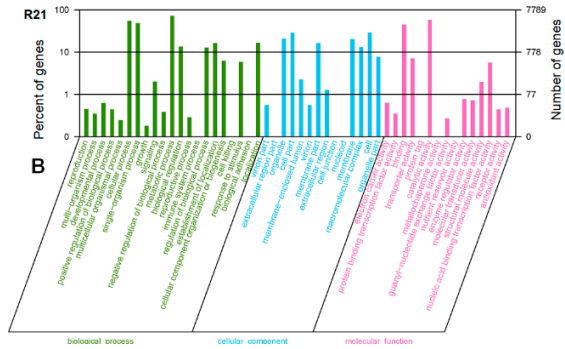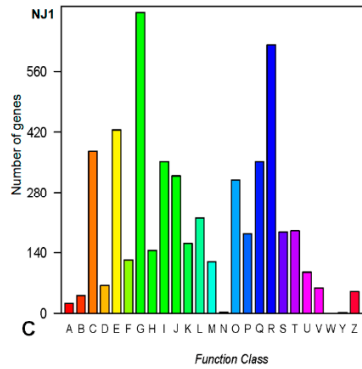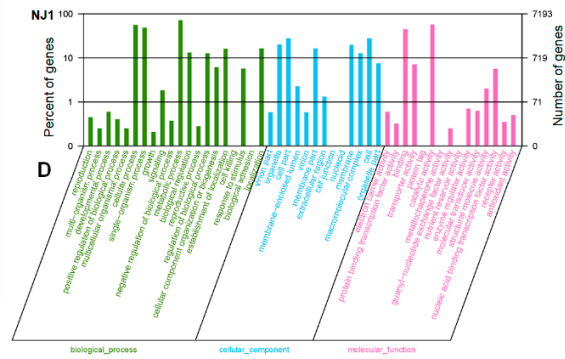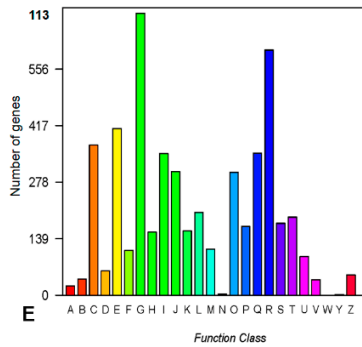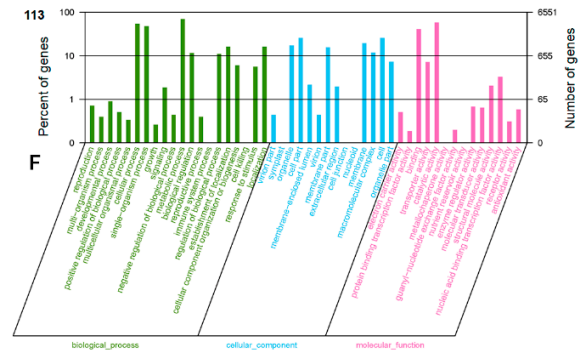

**Figure S1:** COG analyses and Go annotation of three *Penicillium* species. COG analysis and GO annotation of R21 are shown in (A) and (B); COG analysis and GO annotation of NJ1 are shown in (C) and (D); COG analysis and GO annotation of 113 are shown in (E) and (F), respectively. Function classes are as follows, A: RNA processing and modification; B: Chromatin structure and dynamics; C: Energy production and conversion; D: Cell cycle control, cell division, chromosome partitioning; E: Amino acid transport and metabolism; F: Nucleotide transport and metabolism; G: Carbohydrate transport and metabolism; H: Coenzyme transport and metabolism; I: Lipid transport and metabolism; J: Translation, ribosomal structure and biogenesis; K: Transcription; L: Replication, recombination and repair; M: Cell wall/membrane/envelope biogenesis; N: Cell motility; O: Posttranslational modification, protein turnover, chaperones; P: Inorganic ion transport and metabolism; Q: Secondary metabolites biosynthesis, transport and catabolism; R: General function prediction only; S: Function unknown; T: Signal transduction mechanisms; U: Intracellular trafficking, secretion, and vesicular transport; V: Defense mechanisms; W: Extracellular structures; Y: Nuclear structure; Z: Cytoskeleton.

### Supplementary Tables

**Table S1.** Sequencing data statistical analysis.

| Sample | Raw sequencing data statistics |                  |                  |                  |           |               | High quality data statistics |                  |                  |               |
|--------|--------------------------------|------------------|------------------|------------------|-----------|---------------|------------------------------|------------------|------------------|---------------|
|        | Insert Size (bp)               | Read Length (bp) | No. Paired Reads | Total Bases (bp) | ≥ Q20 (%) | Average Depth | No. Paired Reads             | No. Single Reads | Total Bases (bp) | Average Depth |
| R21_PE | 410                            | 150              | 12,231,104       | 3,669,331,200    | 96.58     | 105X          | 11,800,356                   | 412,156          | 3,519,910,684    | 101X          |
| R21_2K | 2k                             | 150              | 12,719,398       | 3,815,819,400    | 94.48     | 109X          | 11,731,645                   | 453,821          | 3,393,051,185    | 97X           |
| R21_8K | 8k                             | 150              | 9,766,483        | 2,929,944,900    | 93.90     | 84X           | 8,656,030                    | 394,052          | 2,524,221,021    | 72X           |
| NJ1_PE | 450                            | 150              | 23,457,645       | 7,084,208,790    | 87.03     | 222X          | 21,875,156                   | 1,548,964        | 6,033,645,654    | 189X          |
| NJ1_2K | 2k                             | 150              | 11,620,194       | 3,486,058,200    | 94.84     | 109X          | 11,123,774                   | 418,406          | 3,261,701,253    | 102X          |
| NJ1_8K | 8k                             | 150              | 12,839,765       | 3,851,929,500    | 94.49     | 120X          | 12,201,260                   | 435,339          | 3,580,026,788    | 112X          |
| 113_PE | 500                            | 150              | 20,930,298       | 6,320,949,996    | 89.34     | 186X          | 19,701,019                   | 1,217,922        | 5,577,148,842    | 164X          |
| 113_2K | 2k                             | 150              | 10,603,360       | 3,202,214,720    | 90.95     | 94X           | 10,230,196                   | 354,852          | 2,860,019,724    | 84X           |
| 113_8K | 8k                             | 150              | 7,568,123*2      | 2,285,573,146    | 86.58     | 67X           | 7,221,663*2                  | 325,535          | 1,924,500,423    | 57X           |

**Table S2.** 17-mer analysis.

| <b>K-mer</b> | <b>K-mer_num</b> | <b>Pk_depth</b> | <b>Genome size (bp)</b> | <b>No. used_bases</b> | <b>No. used_reads</b> |
|--------------|------------------|-----------------|-------------------------|-----------------------|-----------------------|
| R21-17       | 2,054,735,844    | 6               | 342,455,974             | 2,446,114,100         | 24,461,141            |
| NJ1-17       | 3,935,966,496    | 121             | 32,528,648              | 4,685,674,400         | 46,856,744            |
| 113-17       | 3,164,741,162    | 90              | 35,163,791              | 3,794,856,730         | 39,382,223            |

**Table S3.** Repeated sequence analysis.

| <b>Strains</b> | <b>R21</b>         |                 | <b>NJ1</b>         |                 | <b>113</b>         |                 |
|----------------|--------------------|-----------------|--------------------|-----------------|--------------------|-----------------|
| <b>Type</b>    | <b>Length (bp)</b> | <b>% Genome</b> | <b>Length (bp)</b> | <b>% Genome</b> | <b>Length (bp)</b> | <b>% Genome</b> |
| SINEs          | 1,191              | 0.00            | 1,729              | 0.01            | 1,176              | 0.00            |
| LINEs          | 12,381             | 0.04            | 18,903             | 0.06            | 20,525             | 0.06            |
| LTR elements   | 155                | 0.00            | 62                 | 0.00            | 32                 | 0.00            |
| DNA elements   | 2,827              | 0.01            | 1,816              | 0.01            | 1,854              | 0.01            |
| Unclassified   | 360                | 0.00            | -                  | -               | -                  | -               |
| Total length   | 262,677            | 0.80            | 365,865            | 1.15            | 279,139            | 0.82            |

Table S4. NRPS and T1PKS secondary metabolite gene clusters.

| Strains                              | Types | Locations                                   | Predicted core structures                                                             |
|--------------------------------------|-------|---------------------------------------------|---------------------------------------------------------------------------------------|
| R21-gene cluster 1<br>(scaffold2)    | NRPS  | 211595 - 264273 nt for cluster 1<br>in R21; | 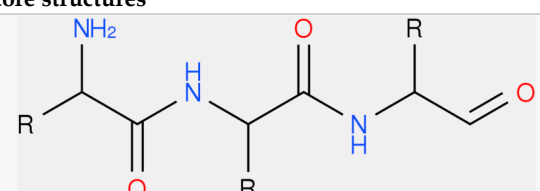   |
| 113-gene cluster 31<br>(scaffold 25) |       | 224915 - 271947 nt for cluster 31<br>in 113 |                                                                                       |
| R21-gene cluster 3<br>(scaffold 4)   | NRPS  | 377720 - 434246 nt                          |    |
| R21-gene cluster 7<br>(scaffold 6)   | NRPS  | 245141 - 291497 nt                          |   |
| R21-gene cluster 8<br>(scaffold 10)  | NRPS  | 56914 - 112491 nt                           |  |

|                                                |                     |                                             |                                                                                                   |
|------------------------------------------------|---------------------|---------------------------------------------|---------------------------------------------------------------------------------------------------|
| <b>R21-gene cluster 11<br/>(scaffold 11)</b>   | NRPS                | 81347 - 131066 nt                           | <div> 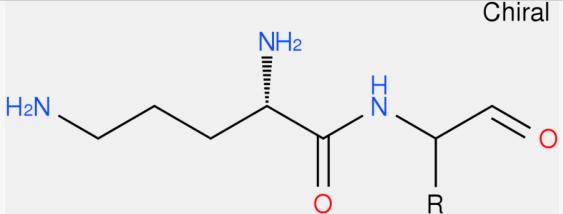 </div>  |
| <b>R21-gene cluster 18<br/>(scaffolder 18)</b> | NRPS                | 285774 - 331605 nt                          | <div>  </div>  |
| <b>R21-gene cluster 19<br/>(scaffold 18)</b>   | NRPS                | 805936 - 848483 nt for cluster 19 in R21;   | <div>  </div> |
| <b>NJ1-gene cluster 7<br/>(scaffold 1)</b>     | NRPS                | 2658543 - 2715172 nt for cluster 7 in NJ1;  |                                                                                                   |
| <b>NJ1-gene cluster 22<br/>(scaffold 3)</b>    | NRPS                | 3207632 - 3254759 nt for cluster 22 in NJ1; |                                                                                                   |
| <b>NJ1-gene cluster 25<br/>(scaffold 4)</b>    | NRPS<br>Indole-NRPS | 342701 - 385365 nt for cluster 25 in NJ1;   |                                                                                                   |
| <b>NJ1-gene cluster 29<br/>(scaffold 4)</b>    | NRPS                | 2882322 - 2936673 nt for cluster 29 in NJ1  |                                                                                                   |
| <b>NJ1-gene cluster 30<br/>(scaffold 4)</b>    | NRPS                | 2920715 - 2969639 nt for cluster 30 in NJ1; | <div>  </div> |
| <b>NJ1-gene cluster 51<br/>(scaffold 13)</b>   | NRPS                | 64947 - 117640 nt for cluster 51 in NJ1     |                                                                                                   |

|                                      |                                 |                                                |                                                                                                     |
|--------------------------------------|---------------------------------|------------------------------------------------|-----------------------------------------------------------------------------------------------------|
| R21-gene cluster 22<br>(scaffold 26) | NRPS                            | 180328 - 226864 nt                             | <p>Chiral</p> 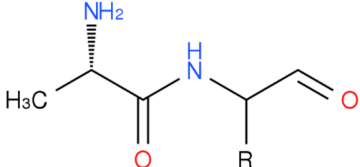   |
| R21-gene cluster 27<br>(scaffold 34) | T1PKS-indole                    | 234250 - 284037 nt for cluster 27<br>in R21;   |                  |
| NJ1-gene cluster 15<br>(scaffold 2)  | NRPS-T1PKS                      | 3156920 - 3217231 nt for cluster<br>15 in NJ1; |                                                                                                     |
| NJ1-gene cluster 21<br>(scaffold 3)  | T1PKS                           | 1759453 - 1822403 nt for cluster<br>21 in NJ1  |                                                                                                     |
| R21-gene cluster 28<br>(scaffold 34) | Indole-NRPS                     | 342325 - 385818 nt                             |                  |
| R21-gene cluster 29<br>(scaffold 36) | NRPS                            | 216912 - 261666 nt                             |                 |
| R21-gene cluster 30<br>(scaffold 39) | NRPS-<br>lantipeptide-<br>T1PKS | 398514 - 462608 nt                             | <p>Chiral</p>  |

|                                      |            |                                                |                                                                                       |
|--------------------------------------|------------|------------------------------------------------|---------------------------------------------------------------------------------------|
| R21-gene cluster 34<br>(scaffold 42) | T1PKS      | 82889 - 144367 nt                              | 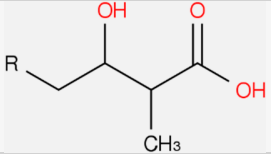   |
| R21-gene cluster 38<br>(scaffold 55) | NRPS       | 89344 - 136024 nt for cluster 38<br>in R21;    |    |
| NJ1-gene cluster 32<br>(scaffold 5)  |            | 1179369 - 1225774 nt for cluster<br>32 in NJ1  |                                                                                       |
| R21-gene cluster 39<br>(scaffold 56) | NRPS-T1PKS | 55063 - 107260 nt for cluster 39<br>in R21;    |    |
| NJ1-gene cluster 13<br>(scaffold 2)  | NRPS-T1PKS | 2407682 - 2471509 nt for cluster<br>13 in NJ1; |                                                                                       |
| NJ1-gene cluster 27<br>(scaffold 4)  | T1PKS      | 714469 - 779347 nt for cluster 27<br>in NJ1;   |                                                                                       |
| NJ1-gene cluster 40<br>(scaffold 8)  | NRPS-T1PKS | 5744 - 57179 nt for cluster 40 in<br>NJ1;      |                                                                                       |
| 113-gene cluster 7<br>(scaffold 3)   | NRPS       | 879987 - 924774 nt for cluster 7<br>in 113;    |                                                                                       |
| 113-gene cluster 38<br>(scaffold 56) | T1PKS-NRPS | 1 - 22358 nt for cluster 38 in 113             |                                                                                       |
| R21-gene cluster 43<br>(scaffold 74) | NRPS       | 34965 - 90439 nt                               |  |



|                                       |             |                                              |                                                                                       |
|---------------------------------------|-------------|----------------------------------------------|---------------------------------------------------------------------------------------|
| R21-gene cluster 44<br>(scaffold 75)  | NRPS        | 23802 - 85362 nt                             | 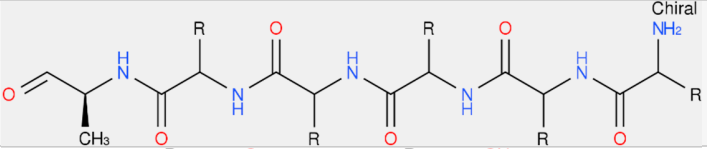   |
| R21-gene cluster 47<br>(scaffold 93)  | NRPS-T1PKS  | 1 - 61539 nt                                 |    |
| R21-gene cluster 48<br>(scaffold 104) | indole-NRPS | 18195 - 61688 nt                             |    |
| R21-gene cluster 49<br>(scaffold 107) | T1PKS-NRPS  | 8122 - 59405 nt                              |    |
| R21-gene cluster 50<br>(scaffold 111) | T1PKS       | 16706 - 71065 nt                             |    |
| R21-gene cluster 52<br>(scaffold 127) | NRPS        | 50265 - 107402 nt for cluster 52<br>in R21;  |  |
| NJ1-gene cluster 2<br>(scaffold 1)    |             | 971605 - 1028764 nt for cluster 2<br>in NJ1; |                                                                                       |
| 113-gene cluster 15<br>(scaffold 6)   |             | 838414 - 896403 nt for cluster 15<br>in 113  |                                                                                       |

|                                       |            |                                            |                                                                                       |
|---------------------------------------|------------|--------------------------------------------|---------------------------------------------------------------------------------------|
| R21-gene cluster 55<br>(scaffold 136) | NRPS       | 1 - 31336 nt for cluster 55 in R21;        | 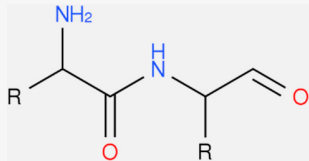   |
| 113-gene cluster 20<br>(scaffold 11)  |            | 198448 - 248440 nt for cluster 20 in 113;  |                                                                                       |
| 113-gene cluster 36<br>(scaffold 32)  |            | 1 - 33075 nt for cluster 36 in 113         |                                                                                       |
| NJ1-gene cluster 6<br>(scaffold 1);   | NRPS       | 1973959 - 2030489 nt for cluster 6 in NJ1; |    |
| NJ1-gene cluster 16<br>(scaffold 2)   |            | 3357491 - 3416063 nt for cluster 16 in NJ1 |                                                                                       |
| NJ1-gene cluster 9<br>(scaffold 1)    | NRPS       | 4608499 - 4666142 nt                       |    |
| NJ1-gene cluster 12<br>(scaffold 2)   | T1PKS-NRPS | 1276282 - 1331278 nt                       |   |
| NJ1-gene cluster 19<br>(scaffold 3)   | T1PKS      | 1295087 - 1339392 nt                       |  |
| NJ1-gene cluster 24<br>(scaffold 3)   | NRPS-T1PKS | 3470394 - 3545313 nt                       |  |

|                                          |            |                    |                                                                                     |
|------------------------------------------|------------|--------------------|-------------------------------------------------------------------------------------|
| <b>NJ1-gene cluster 31</b>               | NRPS-T1PKS | 30706 - 95665 nt   | 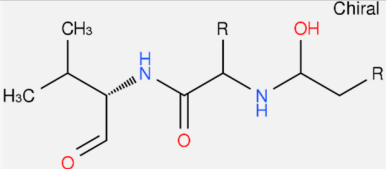 |
| <b>NJ1-gene cluster 52 (scaffold 13)</b> | T1PKS      | 172207 - 215368 nt |  |
| <b>113-gene cluster 21 (scaffold 13)</b> | T1PKS      | 525965 - 584277 nt |  |
| <b>113-gene cluster 30 (scaffold 24)</b> | NRPS       | 62223 - 117514 nt  |  |
| <b>113-gene cluster 33 (scaffold 26)</b> | T1PKS      | 273762 - 317862 nt |  |

Note: NRPS: non ribosomal peptide synthetases; T1PKS: type 1 polyketide synthases.

**Table S5.** Secondary metabolite gene clusters predicted for terpene synthesis in *Penicillium* species.

| <i>Penicillium</i>  | Strains                              | Locations              |
|---------------------|--------------------------------------|------------------------|
| <i>P. expansum</i>  | R19-gene cluster 15 (c00211_gi_6078) | 1 - 40394 nt           |
|                     | R19-gene cluster 30 (c00498_gi_6078) | 12560 - 42693 nt       |
|                     | R21- gene cluster 45 (scaffold 81)   | 50802 - 72079 nt       |
|                     | R21-gene cluster 51 (scaffold 116)   | 43276 - 65327 nt       |
| <i>P. polonicum</i> | RS1-gene cluster 2 (c00001_gi_1024)  | 924501 - 945689 nt     |
|                     | RS1-gene cluster 3 (c00001_gi_1024)  | 946852 - 967463 nt     |
|                     | RS1-gene cluster 9 (c00002_gi_1024)  | 140922 - 162637 nt     |
|                     | RS1-gene cluster 31 (c00002_gi_1024) | 10651398 - 10672615 nt |
|                     | RS1-gene cluster 51 (c00007_gi_1024) | 527429 - 548598 nt     |
|                     | RS1-gene cluster 55 (c00007_gi_1024) | 1813734 - 1835734 nt   |
|                     | RS1-gene cluster 59 (c00007_gi_1024) | 4135222 - 4156499 nt   |
| <i>P. crustosum</i> | NJ1-gene cluster 18 (scaffold 2)     | 4398321 - 4420068 nt   |
|                     | NJ1-gene cluster 37 (scaffold 6)     | 1586748 - 1607901 nt   |
|                     | NJ1-gene cluster 45 (scaffold 10)    | 155277 - 175887 nt     |
|                     | NJ1-gene cluster 46 (scaffold 10)    | 181014 - 202246 nt     |
|                     | NJ1-gene cluster 47 (scaffold 10)    | 381826 - 402886 nt     |
|                     | NJ1-gene cluster 50 (scaffold 12)    | 63618 - 84895 nt       |
| <i>P. maximae</i>   | 113-gene cluster 9 (scaffold 4)      | 885912 - 907312 nt     |
|                     | 113-gene cluster 26 (scaffold 17)    | 566137 - 587123 nt     |

**Table S6.** Putative lipoxygenase genes returned by HMMER searches and their GO biological processes and molecular functions terms.

| Protein ID | Descriptive name              | Amino acid length | GO terms                                                                                                                                                                                                                                                                                   |
|------------|-------------------------------|-------------------|--------------------------------------------------------------------------------------------------------------------------------------------------------------------------------------------------------------------------------------------------------------------------------------------|
| 113_3054   | linoleate 10R-lipoxygenase    | 1110              | <ul style="list-style-type: none"> <li>• responsive to oxidative stress</li> <li>• oxidation-reduction process</li> <li>• cellular oxidant detoxification</li> <li>• peroxidase activity</li> <li>• iron ion binding</li> <li>• oxidoreductase activity</li> <li>• heme binding</li> </ul> |
| 113_5301   | Golgi SNAP receptor subunit 1 | 226               | <ul style="list-style-type: none"> <li>• ER to Golgi vesicle-mediated transport</li> <li>• vesicle fusion</li> <li>• protein transport</li> <li>• SNAP receptor activity</li> </ul>                                                                                                        |
| 113_10665  | psi-producing oxygenase A     | 1080              | <ul style="list-style-type: none"> <li>• responsive to oxidative stress</li> <li>• oxidation-reduction process</li> <li>• cellular oxidant detoxification</li> <li>• peroxidase activity</li> <li>• iron ion binding</li> <li>• oxidoreductase activity</li> <li>• heme binding</li> </ul> |
| R19_154    | lipoxygenase                  | 752               | <ul style="list-style-type: none"> <li>• oxidation-reduction process</li> <li>• oxidoreductase activity</li> <li>• metal ion binding</li> </ul>                                                                                                                                            |
| R19_7323   | cytochrome P450               | 1073              | <ul style="list-style-type: none"> <li>• responsive to oxidative stress</li> <li>• oxidation-reduction process</li> <li>• cellular oxidant detoxification</li> <li>• peroxidase activity</li> <li>• iron ion binding</li> <li>• oxidoreductase activity</li> <li>• heme binding</li> </ul> |
| R19_11425  | cytochrome P450               | 1121              | <ul style="list-style-type: none"> <li>• responsive to oxidative stress</li> </ul>                                                                                                                                                                                                         |

|          |                 |      |                                                                                                                                                                                                                                                                                            |
|----------|-----------------|------|--------------------------------------------------------------------------------------------------------------------------------------------------------------------------------------------------------------------------------------------------------------------------------------------|
|          |                 |      | <ul style="list-style-type: none"> <li>• oxidation-reduction process</li> <li>• cellular oxidant detoxification</li> <li>• peroxidase activity</li> <li>• iron ion binding</li> <li>• oxidoreductase activity</li> <li>• heme binding</li> </ul>                                           |
| R21_6403 | cytochrome P450 | 1073 | <ul style="list-style-type: none"> <li>• responsive to oxidative stress</li> <li>• oxidation-reduction process</li> <li>• cellular oxidant detoxification</li> <li>• peroxidase activity</li> <li>• iron ion binding</li> <li>• oxidoreductase activity</li> <li>• heme binding</li> </ul> |
| R21_7950 | cytochrome P450 | 1121 | <ul style="list-style-type: none"> <li>• responsive to oxidative stress</li> <li>• oxidation-reduction process</li> <li>• cellular oxidant detoxification</li> <li>• peroxidase activity</li> <li>• iron ion binding</li> <li>• oxidoreductase activity</li> <li>• heme binding</li> </ul> |
| R21_8720 | lipxygenase     | 752  | <ul style="list-style-type: none"> <li>• oxidation-reduction process</li> <li>• oxidoreductase activity</li> <li>• metal ion binding</li> </ul>                                                                                                                                            |
| NJ1_8610 | cytochrome P450 | 1073 | <ul style="list-style-type: none"> <li>• responsive to oxidative stress</li> <li>• oxidation-reduction process</li> <li>• cellular oxidant detoxification</li> <li>• peroxidase activity</li> <li>• iron ion binding</li> <li>• oxidoreductase activity</li> <li>• heme binding</li> </ul> |
| NJ1_9064 | cytochrome P450 | 1119 | <ul style="list-style-type: none"> <li>• responsive to oxidative stress</li> <li>• oxidation-reduction process</li> </ul>                                                                                                                                                                  |

|           |                      |      |                                                                                                                                                                                                                                                                              |
|-----------|----------------------|------|------------------------------------------------------------------------------------------------------------------------------------------------------------------------------------------------------------------------------------------------------------------------------|
|           |                      |      | <ul style="list-style-type: none"> <li>cellular oxidant detoxification</li> <li>peroxidase activity</li> <li>iron ion binding</li> <li>oxidoreductase activity</li> <li>heme binding</li> </ul>                                                                              |
| RS1_7484  | hypothetical protein | 610  | <ul style="list-style-type: none"> <li>oxidation-reduction process</li> <li>oxidoreductase activity</li> <li>metal ion binding</li> </ul>                                                                                                                                    |
| RS1_7485  | hypothetical protein | 113  | <ul style="list-style-type: none"> <li>oxidation-reduction process</li> <li>oxidoreductase activity</li> <li>metal ion binding</li> </ul>                                                                                                                                    |
| RS1_8523  | cytochrome P450      | 1123 | <ul style="list-style-type: none"> <li>responsive to oxidative stress</li> <li>oxidation-reduction process</li> <li>cellular oxidant detoxification</li> <li>peroxidase activity</li> <li>iron ion binding</li> <li>oxidoreductase activity</li> <li>heme binding</li> </ul> |
| RS1_11455 | cytochrome P450      | 1073 | <ul style="list-style-type: none"> <li>responsive to oxidative stress</li> <li>oxidation-reduction process</li> <li>cellular oxidant detoxification</li> <li>peroxidase activity</li> <li>iron ion binding</li> <li>oxidoreductase activity</li> <li>heme binding</li> </ul> |

Note: Proteins that were identified as similar to manganese lipoxygenases are highlighted in yellow.

**Table S7.** Lipoxygenase amino acid sequences retrieved from NCBI GenBank.

| Species and strain                                                  | Descriptive name                                                   | NCBI accessions |
|---------------------------------------------------------------------|--------------------------------------------------------------------|-----------------|
| <i>Aspergillus flavus</i>                                           | putative lipoxygenase gene, complete cds                           | EU486993.1      |
| <i>Aspergillus fumigatus</i> Af293                                  | arachidonate 5-lipoxygenase, putative (AFUA_4G02770), partial mRNA | XM_741370.1     |
| <i>Aspergillus fumigatus</i> Af293                                  | lipoxygenase (AFUA_7G00860), partial mRNA                          | XM_741751.1     |
| <i>Aspergillus ochraceus</i>                                        | lipoxygenase (lox) gene, partial cds                               | DQ087531.1      |
| <i>Aspergillus oryzae</i> RIB40                                     | arachidonate 5-lipoxygenase, mRNA                                  | XM_001822113.2  |
| <i>Aureobasidium namibiae</i> CBS 147.97                            | lipoxygenase partial mRNA                                          | XM_013571613.1  |
| <i>Chaetomium thermophilum</i> var. <i>thermophilum</i> DSM 1495    | lipoxygenase-like protein                                          | XM_006697090.1  |
| <i>Colletotrichum fiorinae</i> PJ7                                  | manganese lipoxygenase mRNA                                        | XM_007598573.1  |
| <i>Colletotrichum gloeosporioides</i> Nara gc5                      | arachidonate 8-lipoxygenase (CGGC5_5785), partial mRNA             | XM_007276522.1  |
| <i>Colletotrichum gloeosporioides</i> Nara gc5                      | lipoxygenase 1 (CGGC5_3431), partial mRNA                          | XM_007273701.1  |
| <i>Eutypa lata</i> UCREL1                                           | putative manganese lipoxygenase protein mRNA                       | XM_007789827.1  |
| <i>Eutypa lata</i> UCREL1                                           | putative manganese lipoxygenase protein mRNA                       | XM_007790759.1  |
| <i>Eutypa lata</i> UCREL1                                           | putative manganese lipoxygenase protein mRNA                       | XM_007798792.1  |
| <i>Gaeumannomyces graminis</i> var. <i>avenae</i> strain CBS 870.03 | manganese lipoxygenase gene, complete cds                          | AY040824.2      |
| <i>Gaeumannomyces graminis</i> var. <i>tritici</i>                  | manganese lipoxygenase mRNA, partial cds                           | AY040825.1      |
| <i>Gaeumannomyces graminis</i> var. <i>tritici</i> R3-111a-1        | manganese lipoxygenase mRNA                                        | XM_009223395.1  |
| <i>Glarea lozoyensis</i> ATCC 20868                                 | lipoxygenase mRNA                                                  | XM_008081989.1  |
| <i>Gibberella moniliformis</i>                                      | lipoxygenase (LOX1) gene, complete cds                             | AY699875.1      |
| <i>Grosmannia clavigera</i> kw1407                                  | arachidonate 8-lipoxygenase partial mRNA                           | XM_014315415.1  |
| <i>Grosmannia clavigera</i> kw1407                                  | arachidonate 15-lipoxygenase precursor partial mRNA                | XM_014316099.1  |
| <i>Isaria fumosorosea</i> ARSEF 2679                                | lipoxygenase partial mRNA                                          | XM_018852750.1  |
| <i>Magnaporthe grisea</i>                                           | manganese lipoxygenase mRNA, partial cds                           | AY829440.1      |
| <i>Magnaporthe grisea</i>                                           | manganese lipoxygenase mRNA, partial cds                           | AY858988.1      |
| <i>Magnaporthe oryzae</i>                                           | manganese lipoxygenase                                             | KT734829.1      |
| <i>Magnaporthe oryzae</i> 70-15                                     | manganese lipoxygenase partial mRNA                                | XM_003715958.1  |
| <i>Metarhizium acridum</i> CQMa 102                                 | putative lipoxygenase 1 partial mRNA                               | XM_007817565.1  |
| <i>Marssonina brunnea</i> f. sp. 'multigermtubi' MB_m1              | manganese lipoxygenase (MBM_04109), mRNA                           | XM_007291936.1  |
| <i>Metarhizium acridum</i> CQMa 102                                 | lipoxygenase partial mRNA                                          | XM_007809403.1  |
| <i>Metarhizium brunneum</i> ARSEF 3297                              | lipoxygenase partial mRNA                                          | XM_014692946.1  |
| <i>Metarhizium majus</i> ARSEF 297                                  | lipoxygenase 1 partial mRNA                                        | XM_014722715.1  |



|                                       |                                                   |                |
|---------------------------------------|---------------------------------------------------|----------------|
| <i>Metarhizium majus</i> ARSEF 297    | lipoxygenase 1 partial mRNA                       | XM_014725819.1 |
| <i>Metarhizium majus</i> ARSEF 3297   | lipoxygenase 1 partial mRNA                       | XM_014694440.1 |
| <i>Metarhizium robertsii</i> ARSEF 23 | lipoxygenase mRNA                                 | XM_007819258.1 |
| <i>Metarhizium robertsii</i> ARSEF 23 | lipoxygenase mRNA                                 | XM_007824276.1 |
| <i>Neosartorya fischeri</i> NRRL 181  | lipoxygenase, putative (NFIA_030810) partial mRNA | XM_001262544.1 |
| <i>Neosartorya fischeri</i> NRRL 181  | lipoxygenase, putative (NFIA_113540) partial mRNA | XM_001262719.1 |
| <i>Neurospora crassa</i> OR74A        | lipoxygenase mRNA                                 | XM_953084.2    |
| <i>Paraphaeosphaeria sporulosa</i>    | lipoxygenase partial mRNA                         | XM_018181084.1 |
| <i>Paraphaeosphaeria sporulosa</i>    | lipoxygenase partial mRNA                         | XM_018184567.1 |
| <i>Penicillium expansum</i>           | lipoxygenase mRNA                                 | XM_016740027.1 |
| <i>Phialocephala scopiformis</i>      | lipoxygenase partial mRNA                         | XM_018218786.1 |
| <i>Phialocephala scopiformis</i>      | lipoxygenase partial mRNA                         | XM_018220843.1 |
| <i>Pochonia chlamydosporia</i> 170    | manganese lipoxygenase protein partial mRNA       | XM_018282120.1 |
| <i>Scedosporium apiospermum</i>       | linoleate 8R-lipoxygenase partial mRNA            | XM_016789794.1 |
| <i>Togninia minima</i> UCRPA7         | putative manganese lipoxygenase protein mRNA      | XM_007913037.1 |
| <i>Trichoderma gamsii</i>             | manganese lipoxygenase mRNA                       | XM_018802094.1 |
